# **sCNAPhase: using haplotype resolved read depth to genotype somatic copy number alterations from low cellularity aneuploid tumors**

Wenhan Chen<sup>1</sup>, Alan J. Robertson<sup>1</sup>, Devika Ganesamoorthy<sup>1</sup> and Lachlan J.M. Coin<sup>1</sup>

<sup>1</sup> Institute for Molecular Biosciences, The University of Queensland .

Address correspondence to:

Wenhan Chen <[wenhan.chen@imb.uq.edu.au](mailto:wenhan.chen@imb.uq.edu.au)>

Lachlan J.M. Coin <[l.coin@imb.uq.edu.au](mailto:l.coin@imb.uq.edu.au)>

Keywords: chromosomal abnormalities, contamination, haplotype phasing, normal, ploidy, sCNAPhase, somatic copy number alterations

## Abstract

Accurate identification of copy number alterations is an essential step in understanding the events driving tumor progression. While a variety of algorithms have been developed to use high-throughput sequencing data to profile copy number changes, no tool is able to reliably characterize ploidy and genotype absolute copy number from tumors which contains less than 40% tumor DNA. To increase our power to resolve the copy number profile of these low cellularity tumor genomes, we developed a novel approach which pre-phases heterozygote germline SNPs in order to replace the commonly used 'B-allele frequency' with a more powerful 'parental-haplotype frequency'. We also describe a novel 'digital spectral karyotyping' approach for visualization of copy number alterations.

We apply our tool - sCNPhase - to characterize the copy number and loss-of-heterozygosity profiles of four publicly available breast cancer cell-lines. Comparisons to previous spectral karyotyping and microarray studies revealed that sCNPhase reliably identified overall ploidy and the individual copy number changes from each cell-line. Analysis of tumor-normal cell-line mixtures demonstrated the capacity of this method to determine the level of tumor purity as little as 5% tumor DNA and to consistently identify sCNAs and characterize ploidy in samples at 10% tumor purity. This novel methodology has the potential to bring sCNA profiling to low-cellularity tumors, a form of cancer unable to be profiled by current methods.

## Introduction

Somatic Copy Number Alterations (sCNAs) represent an important class of mutation in the cancer genome, evident by the large number of short focal sCNAs and larger chromosomal scale changes seen in the analysis of individual tumor genomes (Beroukhi et al. 2010). This class of mutation has been linked to tumor progression, metastasis, multidrug resistance and poor clinical outcomes (Carter et al. 2006; Sheffer et al. 2009; Lee et al. 2011; Hieronymus et al. 2014; Bambury et al. 2015). Despite the sporadic accumulation of sCNAs during tumor progression, a number of regions are subject to recurrent sCNAs (Zack et al. 2013). Some of these recurrent sCNAs are found across different cancer types, while others were specific to a particular type or subtype of the disease (Chin et al. 2006; Sheffer et al. 2009; Cho et al. 2011; Curtis et al. 2012). As a result, determining the sCNAs in an individual tumor sample has become standard practice in pathology labs for the treatment of some cancers. For example, this is routinely used to assign the optimal chemotherapeutic treatments for patients with breast cancer who contain additional copies of the *HER2* gene (Bast et al. 2001; Slamon et al. 2001).

Despite the importance of this class of mutation, it can be difficult to characterize the copy number profile of a tumor genome. Large numbers of invading cells with a normal, diploid genome, such as endothelial or immune cells, can obscure the mutations in the tumor genome (Carter et al. 2012). These low cellularity samples represent a significant challenge as the best current methods fail to produce the correct results when tumor purity falls below 40% (**Supplementary Table 1**). The tumor purity for a number of serious forms of cancer, such as Breast Invasive Carcinoma, Lung Adenocarcinoma and some forms of Melanoma routinely fall below this threshold, moreover multiple cancers including renal clear cell carcinoma and lower grade glioma show a decreased survival time with lower tumor purity (Aran et al. 2015). Thus there is an important unmet need to identify copy number mutations in low purity samples.

It is possible to survey the copy number profile of samples with a high tumor content, using a number of different techniques, however it is difficult to characterize the full spectrum of sCNAs with a single technology. Spectral Karyotyping (SKY) is one of the most accurate tools for characterizing and visualizing genome wide changes in ploidy (Schröck et al. 1996; Sirivatanauksorn et al. 2001; Storlazzi et al. 2010; Stephens et al. 2011), but suffers from a limited resolution and is low throughput. More recent technologies, such as comparative genomic hybridization (CGH) and single-nucleotide polymorphism (SNP) microarrays have all provided powerful approaches for interrogating the tumor genome and identifying copy number mutations (Zhao et al. 2004; Conrad et al. 2010; Pinto et al. 2011; Carter et al. 2012; Krijgsman et al. 2014). While these approaches have been used effectively to profile sCNAs across a large number of tumor samples, the performance of these tools are restricted by the resolution of different microarray platforms.

High throughput sequencing (HTS) is a powerful technology for identifying sCNAs, which may make it possible to characterize the complete copy number profile of impure cancer samples. A number of computational tools have been designed to identify copy number changes, characterize loss of

heterozygosity (LOH) and identify homozygous deletions, as well as address the challenges posed by stromal cell contamination in tumor samples from HTS data (**Supplementary Table 1**). These tools use a variety of different signals present in HTS data including read depth aberration, B-allele frequency at somatic and germline SNPs. Many of these tools do not address ploidy, and most of them are not suitable for samples with tumor purity less than 40% (Yau et al. 2010; Gusnanto et al. 2012; Li and Xie 2014; Oesper et al. 2014). Only Absolute and CNANorm have an explicit parameterization of ploidy in their model. Absolute has been shown to accurately estimate tumor ploidy and purity in tumor cell-line derived tumor-normal mixture samples which contained as little as 40% tumor DNA (Carter et al. 2012). CLImAT is a recently introduced tool, which uses read-depth and BAF to estimate the ploidy and purity of impure tumor genomes and also characterizes copy number and LOH changes (Yu et al. 2014). At 20% tumor purity, CLImAT demonstrated more robust purity and ploidy estimates as well as greater sCNA and LOH calling accuracy than Absolute (Carter et al. 2012), SNVMix (Goya et al. 2010), Control-FREEC (Boeva et al. 2012) and Patchwork (Mayrhofer et al. 2013), however this was evaluated using simulated tumor chromosomes rather than tumor-normal mixture samples.

Modelling BAF has strengths and limitations complementary to read-depth (RD) modelling. BAF - which effectively uses an internal control of one allele versus the other - is less susceptible to position-specific biases, such as GC and mappability biases. However, one striking disadvantage of BAF modelling is that it is not possible to directly summate the allelic depth signal over multiple adjacent SNPs, as the non-reference alleles at one adjacent positions may not be on the same parental haplotype. Summating RD over windows of size from 10kb up to 1Mb leads to substantial increases in statistical power to detect sCNAs. We hypothesized that application of state-of-the-art computational phasing approaches, incorporating population haplotype from the 1000 genomes project (Altshuler et al. 2012) as well as direct within-read phasing (Delaneau et al. 2013), would allow us to sum allelic depth along phased haplotypes to obtain *parental haplotype frequency* (PHF) estimates. We further hypothesized that modelling PHF instead of BAF could lead to improved power characterize tumor ploidy and sCNAs at ultra-low levels of tumor purity.

In this manuscript we present sCNaphase (<https://github.com/Yves-CHEN/sCNaphase>), a tool, which has been developed to characterize the full copy number profile of a cancer sample across a range of tumor purity. It achieves this by inferring tumor ploidy, sCNAs and regions of LOH across all levels tumor purity by integrated modelling of PHF and RD. We show that sCNaphase has accuracy comparable to SKY in determining genome-wide increases in ploidy and it is able to identify focal sCNAs that are consistent with results from microarray analyzes. We also show that sCNaphase can confidently determine regions that have undergone a loss of heterozygosity event and identify regions of homozygous deletion. Moreover, sCNaphase consistently generates accurate sCNA segmentations at low levels of tumor purity and can accurately define levels of tumor purity in mixtures containing 5% tumor DNA.

## Results

We downloaded high quality sequencing data from eight publicly available, well-characterized cancer cell-lines. These cell-lines were generated from matched tissue samples and represent breast cancer and normal tissue samples from four patients (Table 1).

**Table 1. Samples included in analysis**

| Cell-line | Platform  | Library    | Coverage | Tissue        | Annotation                                                                  |
|-----------|-----------|------------|----------|---------------|-----------------------------------------------------------------------------|
| HCC1143   | HiSeq2000 | Paired WGS | 50x      | Breast Ductal | 52 years female, Caucasian with STAGE IIA, grade 3 Breast ductal carcinoma  |
| HCC1143BL | HiSeq2000 | Paired WGS | 60x, 30x | Blood         | Paired 60x normal for HCC1143 and independent 30x sample                    |
| HCC1954   | HiSeq2000 | Paired WGS | 58x      | Breast Ductal | 61 years female, Indian with STAGE IIA, grade 3 Breast ductal carcinoma.    |
| HCC1954BL | HiSeq2000 | Paired WGS | 71x, 30x | Blood         | Paired 60x normal for HCC1954 and independent 30x sample                    |
| HCC1187   | HiSeq2000 | Paired WGS | 93x      | Breast Ductal | 41 years female, Caucasian with STAGE IIA, grade 3 Breast ductal carcinoma  |
| HCC1187BL | HiSeq2000 | Paired WGS | 49x      | Blood         | Paired normal for HCC1187                                                   |
| HCC2218   | HiSeq2000 | Paired WGS | 83x      | Breast ductal | 38 years female, Caucasian with STAGE IIIA, grade 3 Breast ductal carcinoma |
| HCC2218BL | HiSeq2000 | Paired WGS | 37x      | Blood         | Paired normal for HCC2218                                                   |

### Haplotype phasing greatly improves the power to identify sCNA from allelic depth

The B-allele frequency (BAF) is commonly used to detect the presence of copy number variants (CNVs) in normal, diploid genome (Coin et al. 2010). This signal can also be interrogated to find sCNAs by looking for deviations from an expected equal ratio of two alleles at germ-line heterozygous SNPs. In order to investigate the power in this signal, we calculated Allelic Depth (AD) at all germ-line heterozygous SNPs in a tumor derived cell-line (HCC1143, see Table 1) at varying tumor purities, as well as in the matched normal sample (note that an independent normal was used to generate artificial mixed tumor/normal samples at varying purity, see Methods). The distribution of p-values under a null model which assumes an equal ratio is inflated even for the normal sample, due to the presence of germline CNVs (**Supplementary Figure 1**), thus we instead calculate p-values under the assumption that tumor BAF is the same as germ-line BAF, which corrects this inflation (**Figure 1A**). BAF provides substantial power to identify sCNA at 100% purity (**Figure 1B.**), but the signal is too weak at 5% purity to identify any sCNAs (**Figure 1C.**).

To investigate the improvement in power to detect sCNAs using PHF rather than BAF, we phased germline heterozygotes using SHAPEIT2 (Delaneau et al. 2013) and the panel of reference haplotypes from the 1000 Genomes Project, then used this information to calculate tumor PHF in non-overlapping windows of 40 consecutive heterozygous SNPs (See methods). This strategy dramatically improved the power to detect sCNAs in the 100% purity sample (Figure 1E) and 5% (Figure 1F), and did not lead to spurious identification of sCNAs in the normal sample (Figure 1D).

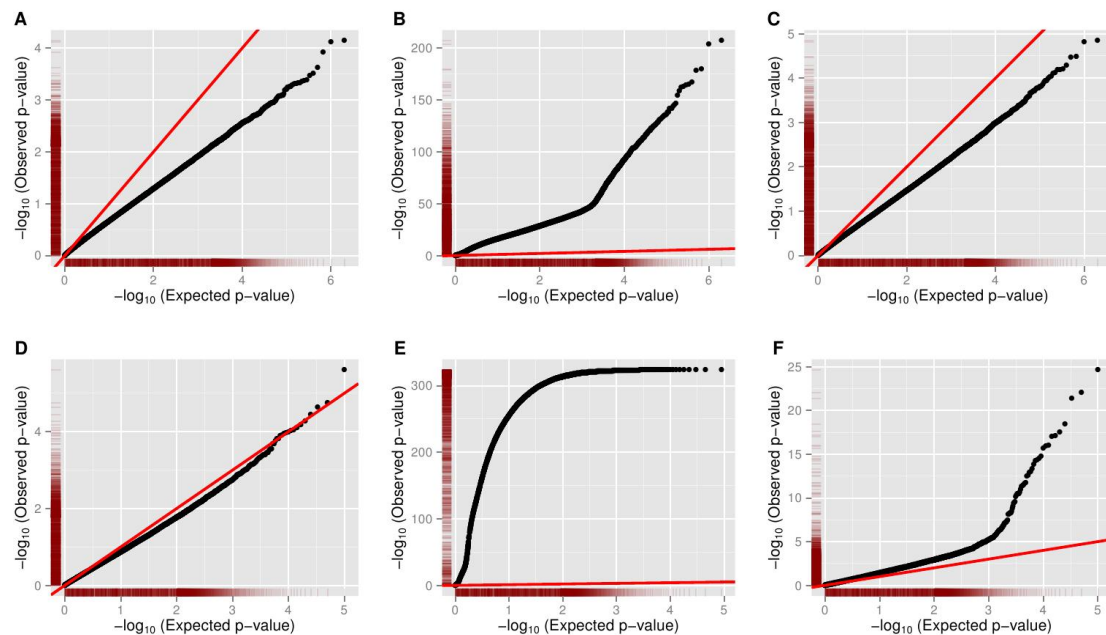

**Figure 1.** The capacity of different Allele Frequencies to determine sCNAs in tumor derived cell-line samples. Each of the points in the Q-Q plots corresponds to a p-value for a pair of allelic depths from a tumor derived cell line (HCC1143) at all germ-line heterozygote SNPs in different scenarios. The red line represents the expected distribution of p-values under the null hypothesis (of no sCNA). P-values are calculated using a binomial distribution with probability of success equal to observed germline BAF (A, B, C) or PHF (D, E, F). Deviation above this line indicates power to detect sCNA (A) Using BAF on 0% tumor purity sample (i.e. normal). (B) Using BAF at 100% tumor purity (C) Using BAF at 5% tumor purity. (D) Using PHF on a 0% tumor purity sample (i.e. normal). (E) Using PHF at 100% tumor purity. (F) Using PHF on 5% tumor purity.

We developed sCNaphase to capitalize on the capacity of the PHF-based approach to characterize copy number profiles at very low tumor purity. This method was designed to integrate PHF (derived from computational phasing) with the total read depth to identify sCNAs, haplotype-specific copy number mutations, estimate the tumor content of a sample and accurately characterize changes in tumor ploidy (Figure 2).

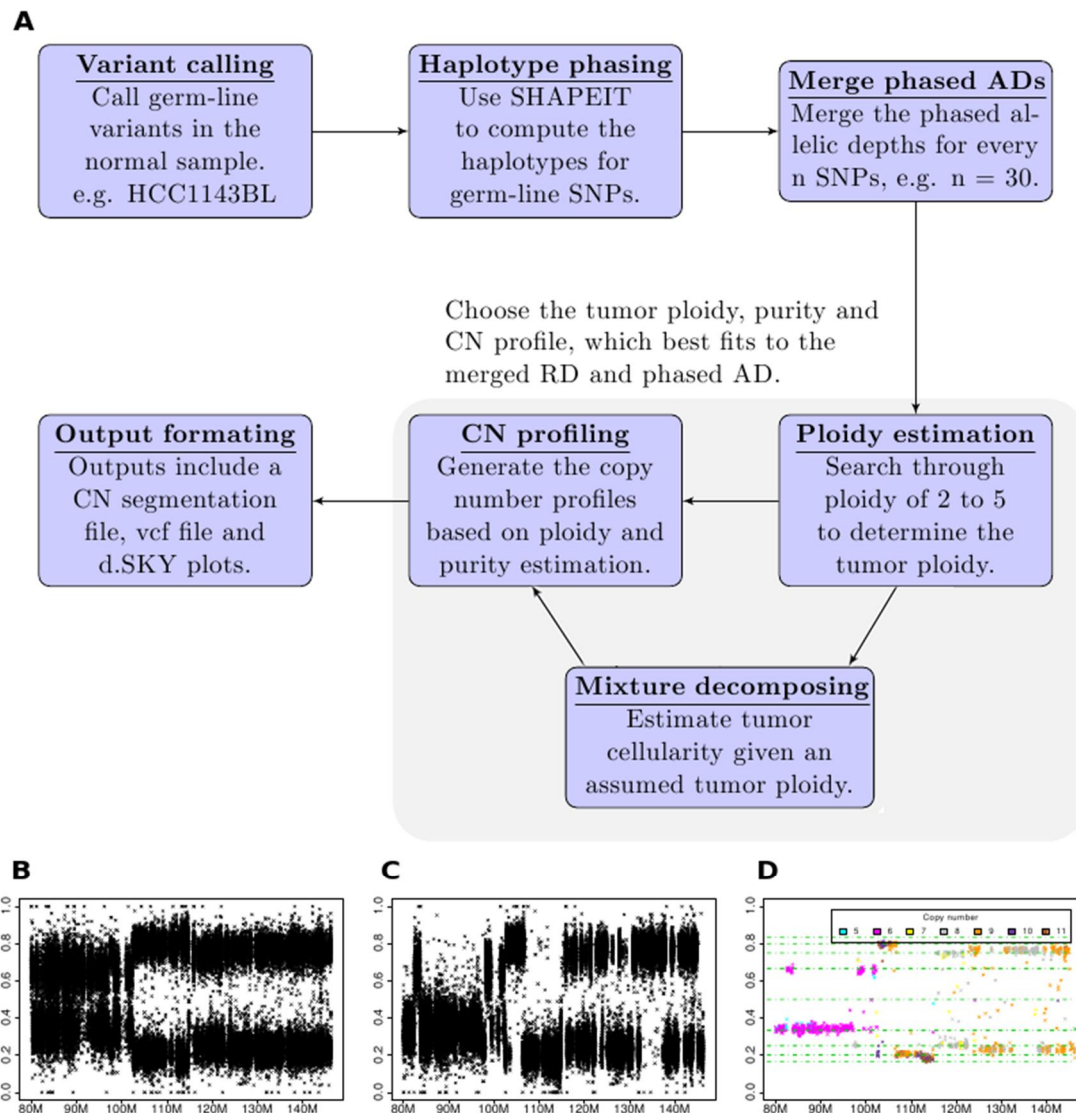

**Figure 2.** The individual steps that make up the sCNPhase workflow. (A) Each panels shows an individual process used by sCNPhase to characterize the copy number profile from matched tumor and normal pairs. (B) The BAFs from a region of chromosome 8 from the HCC1143 breast cancer cell-line. (C) The application of phasing to the BAF data makes it possible to identify PHFs, regions composed of 40 adjacent germline, heterozygous SNPs. Each PHF increase the power of this analysis and makes it possible to better reflect the copy number profile of this region. (D) Application of the sCNPhase pipeline to the phased data, calls specific copy number changes.

In order to characterize the complete copy number profile of a tumor sample, sCNPhase is broken into a number of distinct steps (**Figure 2**). Analysis of the matched normal sample is used to identify heterozygous SNPs present in the germline, these results are passed through SHAPEIT2 (Delaneau et al. 2013), a method that uses information from the 1000 Genomes Project to determine the haplotype of each these heterozygous alleles. The allelic depth from groups of 40 of these polymorphic sites are merged to produce a PHF region (90% of PHF regions are < 100kb). This PHF information is first used to estimate the maximum likelihood of a tumor belonging to a specific ploidy, our model examines a larger range of ploidy than other tools, allowing us to characterize samples more complex than a triploid.



This ploidy information is used to determine tumor purity and estimate tumor cellularity in an iterative manner. Together this information used to identify the individual copy number changes (Methods).

Analysis of each of the matched cell-line pairs using sCNPhase revealed that a significant fraction of the genome had been altered by some form of copy number mutation. In some cell-lines, this analysis classified a large amount of the genome as having undergone an LOH event (**Table 2**) such as HCC1143 and HCC1187, interestingly in HCC1143 the majority of these LOH events corresponded to regions that contained two or more copies. These analyses also indicate that each of the cell-lines had seen a significant increase in ploidy.

Table 2: Summary of results from sCNPhase on 4 cancer cell lines. The proportion of the genome that has undergone sCNA is calculated as the proportion of the genome with copy number not equal to nearest integer ploidy.

| Cell-line                          | Estimated Ploidy              |                             | Proportion of genome |               |                                       |
|------------------------------------|-------------------------------|-----------------------------|----------------------|---------------|---------------------------------------|
|                                    | Ploidy determined by sCNPhase | Ploidy determined by COSMIC | Undergone sCNA       | Undergone LOH | Undergone LOH with more than 2 copies |
| <b>HCC1143*</b><br>Hypo-tetraploid | 3.7                           | 3.36                        | 83%                  | 46%           | 30%                                   |
| <b>HCC1954*</b><br>Tetraploid      | 4.5                           | 4.2                         | 43%                  | 8%            | 6%                                    |
| <b>HCC1187*</b><br>Hypo-triploid   | 2.7                           | 2.64                        | 28%                  | 58%           | 8%                                    |
| <b>HCC2218#</b><br>Tetraploid      | 4.2                           | 3.93                        | 64%                  | 14%           | 4%                                    |

\* Cell-line with the ploidy determined from SKY (Grigorova et al. 2005).

# Cell-line with the ploidy determined from flow cytometry (Kao et al. 2009).

### Digital Spectral Karyotyping with sCNPhase is concordant with spectral karyotyping

We developed a visualization tool for the output from sCNPhase, which we call *digital spectral karyotyping (dSKY)*, as it generates an image, which is directly comparable to spectral karyotyping (**Figure 3**). These dSKY plots make visual identification of aneuploidy, loss of heterozygosity and focal changes straightforward. To build on SKY platform, red shading on the chromosome ideograms indicates regions of LOH, and green shading indicates double deletions.

dSKY plots generated from the sCNPhase analysis of these cell-lines, were compared to images from existing SKY analyses of the same cell lines (**Figure 3**, **Supplementary Figure 2**) (Grigorova et al. 2005). Results from sCNPhase were highly concordant with those from the SKY analysis, both at the level of average ploidy (**Table 2**) and also in the identification of large-scale genomic alterations. For example, both the sCNPhase and SKY analysis of HCC1187 classified this cell-line as hypo-triploid and identified 4 complete copies of chromosome 7 (**Figure 3**). The higher resolution provided by



sCNaphase, reveals more information about the length and the exact location of smaller sCNAs not readily visible by the traditional SKY analyses, such as a focal amplification in 10q23.1 (**Figure 3**; High resolution image at [https://figshare.com/authors/\\_/1365237](https://figshare.com/authors/_/1365237)). sCNaphase identified regions that had undergone an LOH event, which can provide additional insight into the mutational history of a tumor sample. For example both the sCNaphase and SKY analyses of HCC1143 identified 4 copies of chromosome 5 (**Supplementary Figure 2AB**), however our analyses revealed that this chromosome as having undergone LOH. Our results indicate that this mutation was not the result of the duplication of both parental chromosomes but rather the deletion of one, coupled with the 4x amplification of the other.

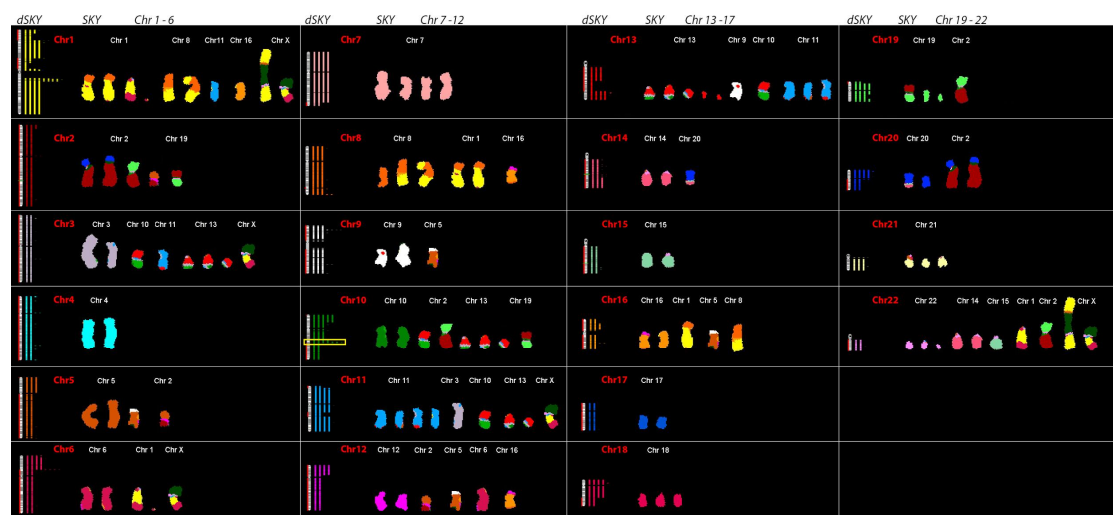

**Figure 3. The digital SKY plots from sCNaphase recapitulate the results from SKY analysis**

The dSKY plot from the sCNaphase analysis of HCC1187, as well as the results from an existing SKY analysis of the same cell-line (Grigoriou et al. 2005) for each chromosome are shown side by side. While there are some minor differences such as chromosome 9 and 18, the results from these two methods are largely consistent with one another. A yellow box highlights a recurrent, focal amplification on the q arm of chromosome 10.

### **sCNaphase accurately calculates tumor ploidy, tumor purity and sCNAs across a range of different levels of simulated tumor purity**

The presence of stromal cells, or other cells with a normal diploid genome in a solid tumor sample can impact the capacity of genomic-based approaches to characterize mutations in a tumor sample (Carter et al. 2012). To assess the performance of sCNaphase to characterize impure tumor samples, simulated mixtures from HCC1143 and HCC1954 (Wilks et al. 2014) as well as HCC1187 and HCC2218 from Illumina BaseSpace (<https://basespace.illumina.com>) were analyzed (see Methods). To simulate the range of tumor heterogeneities found in primary tumor samples, each cell-line had a number of mixtures analyzed, each with varying proportions of tumor cell-line DNA (95%, 80%, 60%, 40%, 20%, 10%, 5% and 0% - see methods). Each mixture and matched normal sample was passed through the sCNaphase pipeline. Given that the ploidy estimates from the pure cell lines were comparable to the results from SKY (**Table 3**), we assessed the degree to which the analysis from the mixture samples were consistent with the results from the pure cell lines. A similar analysis was carried out using CLImAT (version 1.1),

the BAF-based approach most capable of characterizing low purity samples, which allowed us to examine the increased power offered by the use of PHFs.

This analysis revealed that sCNaphase was able to accurately recapitulate the ploidy results from each of the pure cell-lines across the majority of the mixtures as well as accurately determine the level of tumor DNA in each sample (**Figure 4AB, Supplementary Table 2**). The only inaccurate ploidy calls came from the mixtures that contained ultra-low levels of cell-line DNA (5%) in HCC1954 and HCC2218. Despite this, sCNaphase was still able to accurately report on the amount of cell-line DNA in these samples. Across the entire cohort of mixtures, the sCNaphase results only deviated from the simulated proportion by maximum 2% (**Figure 4B, Supplementary Table 2**). Furthermore, sCNaphase estimated that all 0% cell-line DNA mixtures contained less than 0.1% tumor content, an important measure of the robustness of the algorithm. Cellularity estimates, which can be calculated as a function of tumor purity and ploidy (see Methods) were also reported (**Figure 4C**). The sCNAs identified were consistent across the mixtures (see Methods) except for the 5% mixtures from HCC2218 and HCC1954 in which the ploidy estimates had been incorrectly calculated (**Figure 4D**). Adjusting the ploidy to the correct value rescued the segmentation and allowed sCNaphase to capture the same broad copy number profile from these 5% mixtures (**Supplementary Figure 3**).

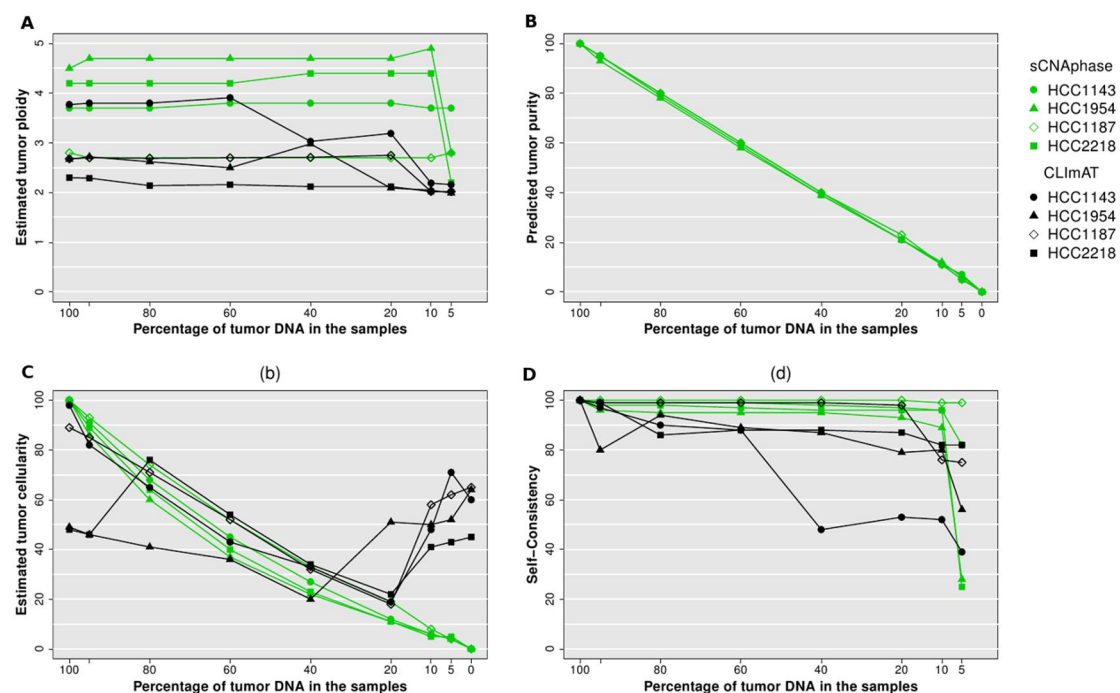

**Figure 4. Inference from sCNaphase and CLImAT on HCC1954 (hyper-tetraploid), HCC2218 (tetraploid), HCC1143 (hypo-tetraploid) and HCC1187 (hypo-triploid) across a range of tumor purity.** (A) Inferred ploidy as a function of tumor purity. (B) Estimated tumor purity as a function of simulated tumor purity (proportion of tumor DNA in sample). No results shown for CLImAT as it estimates cellularity only. (C) Estimated tumor cellularity (the proportion of tumor cells in each sample) as function of simulated purity. (D) self-consistency, measured as average of base-pair sensitivity and base-pair specificity, with 100% tumor sample estimate as tumor purity decreases.

In comparison, CLImAT provided robust cellularity estimates for 3 of 4 samples down to 20% tumor purity, but substantially over-estimated tumor cellularity for low purity samples, including the 0% (i.e. normal) mixture sample (Figure 4C). The sCNA predictions of CLImAT were self-consistent down to 20% purity for 3 of 4 samples, although with lower self-consistency scores than sCNPhase (Figure 4D). However, CLImAT, only determined the correct ploidy for two of these cell-lines and for one of these cell-lines it was only in samples that contained high levels of cell-line DNA (HCC1143 at higher than 60%). CLImAT failed to recognize HCC2218 and HCC1954 as tetraploids across all levels of tumor purity (Figure 4B). Furthermore, CLImAT reported inflated cellularity estimates in the low purity mixtures (CLImAT does not report purity). As a result, CLImAT estimated every mixture containing 0% tumor cell-line DNA, to contain a substantial proportion (i.e. greater than 40%) of tumor cells (Figure 4C). This comparison highlights the difficulties involved in correctly predicting ploidy and accurately estimating tumor cellularity in low purity mixtures. These results showcase the utility of the increased power offered by PHFs to resolve complex tumor genomes over the current state-of-the-art BAF based approach.

### Microarray analysis of cell-lines validates the sCNPhase results

The Cancer Cell Line Encyclopedia and the COSMIC Cell Line Project (Forbes et al. 2015) provide an independent annotation of the mutations present in publically available cell-lines. The copy number profiles of the cell-lines analyzed by sCNPhase had been characterized as part of this COSMIC project, and were independently profiled using a PICNIC analysis of microarray data (Greenman et al. 2010). This resource provides us with an independent annotation of the specific sCNAs in each of these cell-lines and allows us to investigate the capacity of sCNPhase to report on individual sCNAs. To compare the annotations of these cell-lines, the base ploidy for each cell-line needed to be determined. With the exception of HCC1187, all cell-lines were treated as tetraploids, while HCC1187 was considered as triploid. Any segment determined to have a value higher than this was defined as an amplification and those with a lower value were defined as a deletion. Sensitivity and specificity were calculated by counting the number of bases overlapping between two events which have the same direction (i.e. gain or loss) relative to the base ploidy (see Methods). This comparison revealed that the majority of events present in the COSMIC annotation of each cell line could be found across the range of mixtures for each cell-line using sCNPhase, when ploidy was properly assigned (Figure 5A, B). In the samples in which ploidy was incorrectly calculated (5% HCC2218 and HCC1954), the capacity of sCNPhase to reflect the COSMIC results was greatly diminished. A similar comparison with the results from CLImAT showed that this approach failed to correctly profile any of the HCC2218 or HCC1954 mixtures (Figure 5A, B). The comparison of the sCNAs identified by an array-based approach to those identified by sCNPhase and CLImAT, illustrate the ability of sCNPhase to identify valid copy number changes across a range of different simulated tumor cellularities.

LOH events are a common feature of the cancer genome and have been previously linked to the inactivation of tumor suppressors (Side et al. 1997; Tuna et al. 2009). Given the capacity of our approach to quantify and identify the haplotype of each chromosome, we assessed the ability of sCNPhase to

identify the LOH events present in the COSMIC annotation of these cell lines (**Figure 5C, D**). This comparison showed sCNPhase identified approximately 90% of the regions of LOHs in COSMIC annotations of these cell-lines while producing only few spurious results (except for HCC1954). Furthermore, sCNPhase was still able to identify the same regions of LOH in the ultra-low purity samples in which ploidy had been incorrectly assigned.

Despite the high level of similarity between the results from sCNPhase and COSMIC for the majority of cell-lines, few regions of LOH in the COSMIC annotation of these cell-lines were not identified in the corresponding sCNPhase analysis. For example, chr9p1-13 of HCC1187 was defined as a region of LOH by both COSMIC and CLImAT (**Figure 5E**), however only small islands of LOH were identified in the sCNPhase analysis of the same region (marked in pink). To identify any shortcomings in the sCNPhase algorithm, we investigated the raw BAFs from this location. This analysis revealed that these regions are unlikely to be homozygous, as the individuals BAFs are highly variable, unlike the remainder of the chromosome (**Figure 5F**).

In the analysis of HCC1954 there was a low degree of overlap between the regions of LOH identified by sCNPhase and CLImAT and those present in the COSMIC LOH annotation of the cell-line. Closer inspection indicated that these differences were due to large chromosomal regions predicted to be LOH in COSMIC, but which appear to be regions of high copy number and allelic imbalance, rather than regions of LOH (**Supplementary Figure 4**). We also found substantial differences between the copy number estimates from COSMIC and sCNPhase for multiple chromosomal arms for HCC1954 as well as differences between the ploidy estimates in COSMIC and those from sCNPhase and the previous SKY analyses (**Supplementary Figure 2,4**). Given the inconsistent results, the COSMIC annotation of the HCC1954 may underestimate the ploidy of this cell-line (Table 2), and as a result, may have reported some regions of LOHs and focal deletions for HCC1954 that do not reflect the true copy number profile of this cell-line.

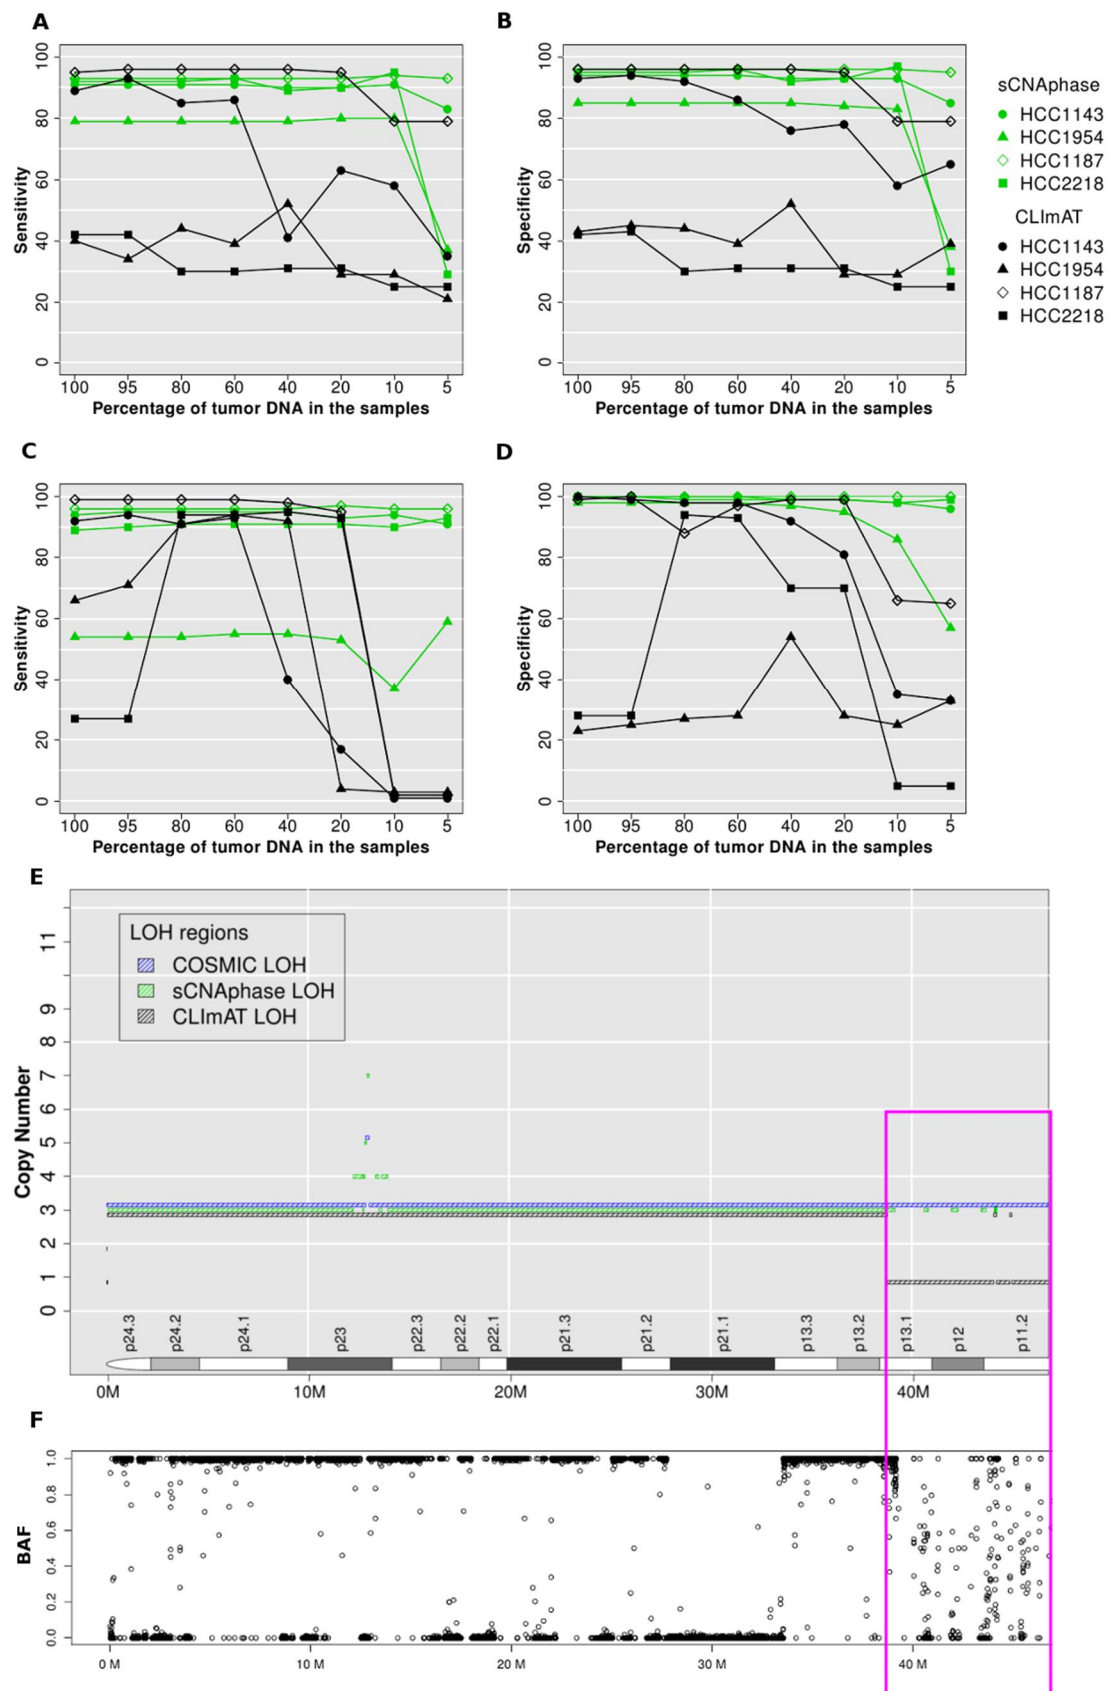

**Figure 5. sCNaphase recapitulates the COSMIC annotation of these cell-lines across a range of purities.** Consistency with COSMIC segmentation for copy number (A, B) and LOH (C, D) at varied tumor purity. For tumor samples at different tumor purity, the base-pair sensitivity in (A, C) and base-pair specificity in (B, D), was calculated by overlapping sCNaphase and CLImAT segmentations estimated at a particular tumor purity with COSMIC

segmentations based on 100% purity tumor samples. Each of the four cell-lines was represented a particular point shape as indicated in the legend. Results from sCNAPhase and CLImAT are shown in green and black respectively. The copy number segmentations of chr9 p-arm HCC1187 from COSMIC, sCNAPhase and CLImAT were shown in (E) in blue, green and black hash lines respectively. BAFs at this region in (F) support the loss of heterozygosity in p-arm except for the region highlighted in the pink box (39M-47M). For most of this 8M region, sCNAPhase did not report copy number or LOH due to the highly variable BAFs which give merging errors (see Method).

### **Focal sCNAs identified by sCNAPhase mirror those identified by microarray analysis**

Given the clinical importance of recurrent focal amplifications in the cancer process, we assessed the performance of sCNAPhase and CLImAT to detect the focal amplifications (100kb to 4Mb) present in the COSMIC annotation for these four cell-lines, using a 50% reciprocal overlap criterion (see Methods). In the analysis of the pure cell-lines sCNAPhase was able to detect majority of the focal amplifications present in the COSMIC annotation of each of these cell-lines (see Methods), with a sensitivity approximately twice that of CLImAT, as well as a specificity which was as good or better than CLImAT (**Table 3, Supplementary Table 3**). As the tumor purity decreased to 10%, the performance of sCNAPhase remained unchanged. However the performance of CLImAT was unstable for all four cell-lines. At 10% tumor purity, CLImAT failed to identify any of the focal amplifications present in the COSMIC annotations from any of the cell-lines, while sCNAPhase was able to identify over 60% of the focal mutations.

The sCNAPhase analysis of HCC1143 and HCC1187 was still able to identify the majority of focal events at 5% tumor purity, the sensitivity of sCNAPhase dropped significantly for HCC1954 and HCC2218, however this was due to the underestimation of the tumor ploidy in these samples. Despite this, sCNAPhase was able to detect at least 12 copies of the pathologically relevant *ERBB2* in HCC1954 and HCC2218 across the entire cohort of mixtures (**Supplementary Table 4**), highlighting the diagnostic potential of sCNAPhase (Neve et al. 2006; Kao et al. 2009) at even 5% tumor DNA. Likewise, another focal peak of amplification, that was found to be recurrently altered in breast cancer (11q13) (Desnoyers et al. 2007; Sawey et al. 2011), was detected in both the 100% HCC1143 and HCC1954 samples, as well as their corresponding 5% mixtures. The identification of focal events, including those that are well known to be clinically significant, across the full range of mixtures demonstrates the capacity of sCNAPhase to identify pathologically relevant sCNAs in ultra-low purity samples.

Homozygous deletions are another class of copy number mutation involved in the tumorigenic process (Knudson et al. 1975; Cairns et al. 1995; Li et al. 1997). The COSMIC annotations show that there are 7 homozygous deletions larger than 100Kb in these four cell-lines (**Supplementary Table 5**). sCNAPhase was able to consistently detect the 3 longer homozygous deletions from HCC1143 and HCC1187. The size of a focal deletion, more specifically, the number of germ-lines SNPs in the region limits sCNAPhase from identifying shorter events. Our analysis of HCC1954 did not detect the longer deletion from chr22 of HCC1954, however analysis of the raw sequencing data suggest that this deletion may be shorter than the 332kb listed in the COSMIC annotation, as the read depth at the flanking region is significantly higher than the deleted region (**Supplementary Figure 5**). Despite this, sCNAPhase did not identify any false positives and was able to consistently identify these deletions at minimal levels of tumor purity. In



contrast, CLImAT failed to identify any of homozygous deletions present in COSMIC, however it did classify a number of other areas, as homozygous deletions that were not present in either the COSMIC or sCNaphase results.

Table 3. The capacity of sCNaphase to detect the focal sCNAs in COSMIC

| Tumor purity | HCC1143<br>15 focal amplification from COSMIC |     | HCC1954<br>94 focal amplification from COSMIC |     | HCC1187<br>2 focal amplification from COSMIC |     | HCC2218<br>18 focal amplification from COSMIC |     |
|--------------|-----------------------------------------------|-----|-----------------------------------------------|-----|----------------------------------------------|-----|-----------------------------------------------|-----|
|              | Sen                                           | Spe | Sen                                           | Spe | Sen                                          | Spe | Sen                                           | Spe |
| 100%         | 80                                            | 23  | 66                                            | 52  | 100                                          | 26  | 61                                            | 31  |
| 80%          | 80                                            | 24  | 67                                            | 47  | 100                                          | 25  | 56                                            | 31  |
| 60%          | 80                                            | 24  | 63                                            | 47  | 100                                          | 27  | 44                                            | 38  |
| 40%          | 67                                            | 28  | 61                                            | 52  | 100                                          | 30  | 78                                            | 25  |
| 20%          | 80                                            | 22  | 65                                            | 57  | 100                                          | 30  | 61                                            | 44  |
| 10%          | 87                                            | 29  | 77                                            | 52  | 100                                          | 23  | 61                                            | 48  |
| 5%           | 80                                            | 23  | 37                                            | 93  | 100                                          | 29  | 22                                            | 100 |

Sen for sensitivity; Spe for specificity.

### sCNaphase identifies biologically significant events in samples too complex for existing methodologies

The comparison between the results from the COSMIC microarray and the sCNaphase analysis of the same cell-lines, demonstrated the capacity of our approach to identify recurrent focal sCNAs that have been previously associated with cancer. While the detection of focal amplifications is essential for any tool designed to characterize the copy number profile of a tumor genome, we wanted to access the capacity of sCNaphase to identify potentially biologically significant changes outside of these more prominent regions and in samples thought to be too complex for other studies.

The use of microarrays to survey the tumor genome, made it possible to quantify the number of chromosomes in tumor sample, while identifying instances of LOH. These studies identified regions recurrently altered by LOH but contained a normal karyotype, something that trait that thought to be the result of multiple mutational processes and too complex to be observed across the genome using prior methodologies. A number of these regions of recurrent Copy Neutral- LOH (CN-LOH) have been directly linked to cancer and include *TP53* as well as *CDNK2A* (Murthy et al. 2002; Mullighan et al. 2007). However the identification of these complex regions with microarrays was not always possible, as they are obscured in samples that contained small amounts of tumor content (<40%) (Carter et al. 2012). Examination of the results from the analysis of the pure cell-lines with sCNaphase, revealed a number of regions that had undergone LOH and contained two or more copies. Furthermore, a number of these regions were present in multiple cell-lines. To investigate the capacity of our tool to characterize this complex event, in samples too complex for existing methods, we examined the results from



sCNPhase to identify instances of recurrent LOH in segments containing two or copies from samples containing very low levels of tumor DNA.

Analysis of the mixtures that contained 10% tumor DNA, revealed that the majority of the regions of CN-LOH, or regions of Acquired Uniparental Polysomy (AUPP - LOH in regions that contain three or more copies), could be identified in the analysis of the corresponding pure cell-lines. Analysis of these low tumor content mixtures, revealed a number of regions of AUPP or CN-LOH shared across multiple cell-lines (**Supplementary Table 6**). These recurrent regions of LOH included chr5q and chr17p as well as parts of chr17q, all of which had been previously found to undergo recurrent CN-LOH in cancer (Murthy et al. 2002; Lips et al. 2007; Tuna et al. 2009; Pedersen et al. 2013).

One of these regions, the p arm of chromosome 17 was found to be altered in all of these cell-lines (this region was not classed as LOH in the 10% mixture from HCC1143, but was correctly classified in the 5% mixture), a result echoed in the literature, which describe the tumor suppressor *TP53*, a gene located in this region as the most common region of CN-LOH across a range of different types of cancer (Tuna et al. 2009; Whibley et al. 2009). To investigate the biological impact of these recurrent regions of LOH and the single nucleotide resolution offer by the HTS platform, we performed an in-depth examination of the *TP53* locus in each of these cell-lines. This analysis revealed homozygous somatic mutations in *TP53* for three of the cell-lines (**Supplementary Figure 6**). In the remaining cell-line HCC2218, two heterozygous germline SNPs were identified (**Supplementary Table 7**), one of which, R283C has been previously shown to increase a carrier's risk of developing cancer (Murthy et al. 2002; Keller et al. 2004; Manoukian et al. 2007). It is likely that the loss of the wild type allele and the amplification of the deleterious SNP only increases this risk. These results demonstrate the power offered by HTS and sCNPhase to characterize the biological impacts of a complex mutation in complex samples.

## Discussion

Although somatic copy number alterations are a well-established driver of cancer, the capacity to identify these mutations are impacted by a number of issues including varying levels of tumor purity and frequent changes in tumor ploidy. As a result, the majority of methods designed to characterize the sCNAs in the cancer genome are unable to accurately profile a significant fraction of primary tumor samples. In this study, we have shown that by taking a haplotype-based approach, sCNPhase can overcome these issues and reliably characterize both genome-wide copy number changes and the individual mutations present in a tumor genome across a range of tumor purities.

The results shown here confirm the capacity of sCNPhase to accurately reflect the copy number profile of a range of different primary tumor like samples. This was achieved by demonstrating that sCNPhase could precisely determine a number of key factors that are essential to correctly characterizing the full scope of copy number changes in a tumor sample. Comparison of the results from the sCNPhase to those from SKY and flow cytometry, illustrated the ability of sCNPhase to correctly reflect the genome-

wide changes in ploidy (**Figure 3** and **Supplementary Figure 2**). Using a range of mixtures, to simulate the challenges posed by low-cellularity primary tumors, we were able to recapitulate the changes in ploidy seen in the analysis of the pure cell-lines, across the spectrum of tumor purities (**Figure 4**). Equally important was that the sCNPhase analyzes of the mixtures that did not contain any cell-line DNA, did not produce false positive results (**Figure 4**). When the specific copy number changes identified by sCNPhase were compared to those identified by microarray, it was apparent that our methodology was able to accurately reflect the individual sCNAs present, across the majority of samples (**Figure 5**). In depth examination of the results from sCNPhase revealed a number of changes that could be linked to the tumorigenic process in these cell-lines, highlighting the potential of this tool to identify biologically significant changes in primary tumor samples. Furthermore, when compared to CLImAT, a BAF-based tool that was found to best handle the challenges posed by primary tumors (**Table 1**), sCNPhase was found to consistently outperform this methodology, highlighting the potential offered by our PHF-based approach. Together, these results demonstrate that using PHFs, sCNPhase is able to better reflect the full range of copy number changes in samples representative of the complexity present in primary tumors.

The accurate characterization of the copy number profile in low cellularity samples as well as the identification of mutations in cancer genes, is suggestive of the potential clinical utility of this tool. While the additional testing with a larger cohort of primary tumor samples is needed to fully realize this, our PHF based approach provides a method to identify the sCNAs in samples from which other tools cannot identify any sCNAs. In addition to low purity tumors or cancer types that routinely suffer from contaminating cells, a potential application of our PHF-based methodology would be in studies that aim to profile the copy number changes in a tumor through the analysis of circulating tumor DNA. Circulating tumor DNA, has been previously shown to contain mutations present in the tumor genome, but tumor DNA in circulation is mixed with DNA from normal cells and the tumor purity is frequently low (10% at most) (Newman et al. 2014). While sCNPhase can successfully profile low purity mixtures, it is likely that in order to realize this an optimized version of the tool will need to be developed.

In conclusion, we have provided evidence to show that sCNPhase is a robust software package, capable of characterizing the copy number profile of cancer samples, across a range of different levels of tumor purity. We have shown that sCNPhase is able to correct for the presence of contaminating normal cells in tumor samples to confidently estimate the genome-wide sCNA changes as well as accurately identify the presence of individual sCNAs. Comparison of the results from sCNPhase to those generated using BAF, shows the dramatic increase in power to resolve these complex genomes offered by our PHF focused approach. In addition, this tool provides an effective way of visualizing data and identifies regions that have undergone a LOH event. Together, these results highlight the strength of sCNPhase and showcase its potential to identify biologically significant changes in a clinical setting.

## Methods

### Datasets

The Illumina whole genome sequencing data of cell-lines, HCC1143, HCC1954, HCC1143BL, HCC1954BL were collected from Variant Calling Benchmark 4 provided by The Cancer Genome Atlas (TCGA) (Wilks et al. 2014), and HCC1187, HCC1187BL, HCC2218 and HCC2218BL were from Illumina BaseSpace. The tumor cell-lines, HCC1143, HCC1954, HCC1187 and HCC2218 were cultured from breast ductal tissue, sequenced at 50x, 58x, 93x and 83x. Patient-matched normal samples, HCC1143BL, HCC1954BL, HCC1187BL and HCC2218BL were from peripheral blood, sequenced at 60x, 71x, 49x and 37x.

The Variant Calling Benchmark 4 simulated tumor-normal mixture samples of HCC1143/HCC1143BL, HCC1954/HCC1954BL were at 30x coverage. They were created by mixing 5%, 20%, 40%, 60%, 80% and 95% of normal DNA to tumor DNA. The normal cell-lines HCC1143BL.30x.compare, HCC1954BL.30x.compare, were sequenced independently at 30x, different from the normal samples used to create the mixture samples. Because BaseSpace provides no mixtures samples for HCC1187/HCC1187BL, HCC2218/HCC2218BL, we created the mixture samples at 30x coverage with 5%, 20%, 40%, 60%, 80% and 95% of tumor DNA, by randomly sampling and mixing suitable amount of reads from tumor and normal samples. To create the low coverage normal controls, we down-sampled bam files of the HCC1187BL and HCC2218BL to 30x coverage. Therefore, for each tumor/normal pairs, there are 6 mixture samples, and 1 independent normal control. In the same way, we created 10% tumor-normal mixtures for all four cell-lines in order to assess the capacity of sCNAPhase at very low level tumor DNA samples.

All the tumor cell-lines are from high-grade breast ductal carcinoma. Based on the expression patterns, HCC1143, HCC1954 and HCC1187 were classified as the Basal A subtype, and HCC2218 as the Luminal subtype. HCC1954 and HCC2218 showed over-expression of *ERBB2* (Neve et al. 2006; Kao et al. 2009).

### Workflow

The workflow is described in **Figure 2**. The workflow includes the determination of the BAF for each heterozygous SNP (**Figure 2a**), generation of phased allelic depths (**Figure 2b**), estimation of sCNAs as well as tumor purity and tumor ploidy (**Figure 2c**). In order to generate allelic phase information, the pipe-line relies on external software for SNP calling, haplotype phasing in the pre-processing steps. Specifically, in current analysis, we start by calling SNP variants from pre-mapped Illumina pair-end sequencing data using BCFtools (Li et al. 2009) in VCF format. Then we used SHAPEIT2 (Delaneau et al. 2013) to perform population-based haplotype phasing at the SNP variants. Notably, the variant calling and in-silico haplotype phasing are only performed once on a normal sample rather than all tumor samples. This is because population-based haplotype phasing is based on a set of common germ-line SNPs and INDELs; however tumor genome is usually significantly altered, therefore not suitable for

calling and phasing SNP variants. For the tumor samples, rather than calling variants, we calculated the allelic depths on the same set of SNP variants using BCFtools.

Due to somatic mutations in tumor, the alleles in tumor are occasionally different from those in normal. The estimation process first checks the consistency of an alternative allele in normal and tumor samples, and then filters loci with inconsistent alternative alleles. After that, sCNPhase merges phased ADs every  $n$  loci. This step significantly reduces the variability of the allelic frequencies, and therefore increase the power in calling sCNAs.

To determine the tumor ploidy, the next step is searching through all possible values from 2 to 5, incrementing by 0.2. Given an assumed tumor ploidy, the pipe-line identifies the tumor cellularity and copy number profile, which is most fitted to the merged read depths and phased allelic depths. As such, the estimated copy number profile with the maximal likelihood is chosen with the corresponding tumor ploidy, cellularity estimations. Based on this estimation, the pipe-line can generate varied outputs including a) a copy number segmentation file indicating which regions are amplified; b) a vcf file includes the genotypes, allelic copy numbers and phases for the SNPs; c) the dSKY plots which resembles the Spectral Karyotyping (SKY) plots. sCNPhase is powered by multithread techniques. This ploidy estimation step take approximately 4 hours on a machine with 12 CPUs at 1600MHz.

### Calculating the parental allele frequency

Given the allelic phase calculated from SHAPEIT2, the two alleles at each SNP are arranged into two haplotypes for the parental chromosomes. If one haplotype is randomly chosen as maternal, the fraction of maternal allele depth  $m_i$  over read depth  $d_i$  at each SNP reflects the amplification of the amplification of one parental chromosome over the other. Defined for a regional  $n$  consecutive SNPs, the *parental haplotype frequency* (PHF) is the sum of maternal allele depth  $m_i$  to the sum of read depth  $d_i$  as follows:

$$PHF_i = \frac{m_i}{d_i} \quad (1)$$

A PHF of 0 or 1 corresponds to a homozygote. For a maternally amplified region, the PHF is expected to be above 0.5. B-allelic frequency (BAF) defined as the fraction of the alternative allelic depth in this region, however, would vary a lot about 0.5, because the amplified allele can be either the reference or alternative allele. In this paper, the number consecutive SNPs ( $n$ ) in a region was set to be 40, but it can be other values.

In ideal cases, when there are no allele-specific biases, such as allelic-specific enrichment during PCR, the probability of seeing maternal allelic depth  $m_i$ , given the genotypes  $g_i^{(t)}$ , read depth  $d_i^{(t)}$ , satisfy a binomial distribution of from a tumor sample is dependent on the genotypes  $g_i^t$ , read depth  $d_i^{(t)}$ , which approximates a binomial distribution of:

$$P_i = \binom{d_i^{(t)}}{m_i^{(t)}} (p_i)^{m_i^{(t)}} (1 - p_i)^{d_i^{(t)} - m_i^{(t)}} \quad (2)$$

$$p_i = \frac{x_i^{(t)}}{x_i^{(t)} + y_i^{(t)}} \quad (3)$$

in which the superscript,  $t$  differentiates a tumor sample from the matched normal.  $x_i^{(t)}$  and  $y_i^{(t)}$  are copy numbers of the maternal and paternal alleles for SNP  $i$ , which define the genotype  $g_i^{(t)}$ . Therefore given a genotype of {MMP},  $P_i$  is 2/3. Different from absolute copy numbers,  $x_i^{(t)}$  and  $y_i^{(t)}$  are copy numbers relative to the germ-line allelic copy number. Therefore if the copy number for the germ-line maternal allele is  $x_i^{(n)}$ , the absolute maternal allelic copy number in tumor would be  $x_i^{(n)} \cdot x_i^{(t)}$ .  $x_i^{(t)}$  of 1 means no somatic copy number alterations. In most cases,  $x_i^{(n)}$  and  $y_i^{(n)}$  are both 1 given the normal being the diploid genome, so that  $x_i^{(t)}$  represents the absolute copy number.

When the genotype for a tumor sample is unknown at a site  $i$ , the parental allelic frequency,  $PHF_i^{(t)}$  is the unbiased estimation of  $P_i^{(t)}$ . The variance of  $PHF_i^{(t)}$  from  $P_i^{(t)}$  is,

$$\text{var}(PHF_i^{(t)}) = \frac{p_i^{(t)}(1 - p_i^{(t)})}{d_i^{(t)}} \quad (4)$$

Therefore, as the read depth  $d_i^{(t)}$  increases, the variance becomes smaller so that the allelic amplification can be inferred from the average  $PHF_i$ . For the genotype of {MMP} ( $P_i^{(t)} = 2/3$ ) and 30x sequencing coverage, the  $PHF_i^{(t)}$  varies in the range of  $2/3 \pm 0.086$ , in 68% of cases (Wald method). This spans possible allelic copy number ratios of 3/5, 2/3, 4/5. For this maternally amplified sCNAs, the merging on the allelic depths at neighbor SNPs, would increase the depth, therefore reduce the variability. If adding up the depths at every 40 SNPs, the variance reduces to 0.023 in 90% cases. In this case, genotypes other than {MMP} become very unlikely.

### Normal-tumor paired test

Due to germ-line copy number variations (CNVs), the genotypes of a normal sample cannot be assumed as {MP} for all the SNPs, although for most of them the assumption is fitted. In order to call sCNAs (copy number gain or loss from the germ-line copy numbers), both the tumor and paired normal samples are required.

Assuming there are no somatic alterations, the  $p_i$  in Equation 2 can be approximated by the  $PHF_i^{(n)}$  from the matched normal sample at a locus  $i$ ,

$$p_i^{(n)} \approx PHF_i^{(n)} = m_i^{(n)} / d_i^{(n)}, \quad (5)$$

in which  $m_i^{(n)}$  and  $d_i^{(n)}$  correspond to the maternal allelic depth and read depth for a SNP from the paired normal sample.

The fitness of this assumption can be analyzed visually from Q-Q plot, which is commonly used to compare if observations (an empirical distribution) fit into certain assumptions (an expected distribution). For a fitted assumption, the Q-Q plot is expected to be approximately  $y=x$ . In our case, this includes 1) calculate the probability at each SNP with Equation 2, 5; 2) rank and treat each probability as the  $i$ th quantile. Since an  $PHF_i^{(n)}$  varies about the  $p_i$ , this variation makes the expected distribution more variable than the empirical distribution of the observations. The Q-Q plot will be slightly deflated from  $y=x$ , even if there are no sCNAs in tumor sample. By merging the allelic depths in each haplotype, the increased depths will reduce the variance of  $PHF_i^{(n)}$  about the  $p_i$ , which restores the Q-Q plot to  $y=x$  as shown in **Figure 1d**. The test on the merged phased ADs is sensitive enough to detect as low as 5% tumor DNA providing a normal-tumor mixture.

### Hidden Markov Model on Allelic Depth and Read Depth

For tumor-normal mixture samples with a tumor cellularity  $tc$ , the likelihood for observing the depths  $\{m_i^{(t)}, d_i^{(t)}, m_i^{(n)}, d_i^{(n)}\}$  still satisfy a binomial distribution in Equation 2. The  $P_i^{(t)}$ , in this case, is given as,

$$e_i^{AD} = P(m_i^{(t)} | d_i^{(t)}, m_i^{(n)}, d_i^{(n)}, g_i^{(t)}, tc) = \binom{d_i^{(t)}}{m_i^{(t)}} (p_i)^{m_i^{(t)}} (1-p_i)^{d_i^{(t)}-m_i^{(t)}} \quad (6)$$

$$p_i = \frac{(1-tc) \cdot m_i^{(n)} + tc \cdot m_i^{(n)} \cdot x_i^{(t)}}{(1-tc) \cdot d_i^{(n)} + tc \cdot m_i^{(n)} \cdot x_i^{(t)} + tc \cdot (d_i^{(n)} - m_i^{(n)}) \cdot y_i^{(t)}} \quad (7)$$

in which  $x_i^{(t)}$  and  $y_i^{(t)}$  are the maternal and paternal allelic copy numbers for a genotype  $g_i^{(t)}$ .

Given the sum of read depths across all sites  $R^{(n)}$  and  $R^{(t)}$  for normal and tumor samples, the likelihood function of read depths  $d_i^t$  and  $d_i^n$  is

$$e_i^{RD} = P(d_i^{(t)} | R^{(t)}, d_i^{(n)}, R^{(n)}, g_i^{(t)}, tc) = \binom{R^{(t)}}{d_i^{(t)}} (F_i)^{d_i^{(t)}} (1-F_i)^{R_i^{(t)}-d_i^{(t)}}, \quad (8)$$

$$F_i = \frac{\gamma_i \cdot cn_i^{(a)} \cdot tc + \gamma_i \cdot cn_i^{(n)} \cdot (1-tc)}{\sum_j \gamma_j \cdot cn_j^{(a)} \cdot tc + \sum_j \gamma_j \cdot cn_j^{(n)} \cdot (1-tc)}, \quad (9)$$

in which  $\gamma_i$  is a factor for the position specific biases, such as the mappability and GC-bias. This is expected to be comparable for tumor and normal samples, given the identical procedure of library preparation and sequencing platform.  $cn_i^{(a)}$  is the absolute copy number in tumor for SNP  $i$ .  $\sum_j \gamma_j cn_j^{(a)}$  and  $\sum_j \gamma_j cn_j^{(n)}$  only vary with global setting of copy numbers at each locus  $cn_j^{(a)}$ .

The difference of the values for the tumor and normal samples reflects the ploidy change  $C$  from diploid, that is

$$C = \frac{\sum_j \gamma_j \cdot cn_j^{(a)}}{\sum_j \gamma_j \cdot cn_j^{(n)}} \quad (10)$$

Given the haploid coverage of normal and tumor samples at  $hc^{(n)}$  and  $hc^{(t)}$ , the expected read depth  $d_i^{(t)}$ ,  $d_i^{(n)}$  can be calculated as follows,

$$d_i^{(t)} = hc^{(t)} \cdot \gamma_i \cdot cn_i^{(t)} \quad (11)$$

$$d_i^{(n)} = hc^{(n)} \cdot \gamma_i \cdot cn_i^{(n)} \quad (12)$$

To find the somatic copy number alterations to the germ-line copy number, we define the relative copy number  $cn_i^{(t)}$  in tumor to the germ-line copy number  $cn_i^{(n)}$  in normal as,

$$cn_i^{(t)} = 2 \cdot \frac{cn_i^{(a)}}{cn_i^{(n)}} \quad (13)$$

With Equation 9, 10, 11, 12, 13, Equation 10 can be solved as,

$$F_i^{(t)} = \frac{d_i^{(n)} \cdot cn_i^{(t)} \cdot tc + d_i^{(n)} \cdot (1 - tc)}{C \cdot tc \cdot R^{(n)} + (1 - tc) \cdot R^{(n)}} \quad (14)$$

in which  $cn_i^{(t)}$  is the sum of  $x_i^{(t)}$  and  $y_i^{(t)}$  given the genotype  $g_i^{(t)}$ . Notably, the mappability factor is cancelled out in this equation. In Equation 14, tumor cellularity  $tc$  and degree of ploidy alteration  $C$  are model parameters.

With likelihood functions  $e_i^{RD}$  and  $e_i^{AD}$ , the complete likelihood of the Hidden Markov Model defined on read depth  $\{RD_i\}$  and allelic depth  $\{AD_i\}$  can be formulated as,

$$\log(P(\{AD_i\}, \{RD_i\})) = \sum_{g_1 \in G} \log(e_i^{RD} \cdot e_i^{AD} \cdot \phi(g_1)) + \sum_{i=2} \sum_{g_i \in G} \log(e_i^{RD} \cdot e_i^{AD} \cdot t(g_i, g_{i-1})) \quad (15)$$

in which  $G$  stands for a set of  $n$  possible genotypes. The probability of genotype transition from a genotype  $g_i$  at SNP  $i$  to  $g_{i+1}$  at SNP  $j$  forms a fully connected transition matrix  $\{t_{ij}\}$ .  $\phi(g_1)$  stands for the initial probability vector for the genotypes in  $G$ . The transition matrix is estimated using Baum-Welch; tumor cellularity  $tc$  is calculated from maximum likelihood estimation.

### Determination of tumor purity and cellularity

The percentage of tumor cells,  $tc$ , in a mixture sample is different from the percentage of the tumor DNA content in sequencing data  $tc_d$ . For tumor with higher than 2 ploidy,  $tc_d$  is bigger than  $tc$ . The relationship of the two scales is shown in following equation,

$$\frac{tc_d}{1 - tc_d} = \frac{\sum_i \gamma_i \cdot cn_i^{(a)} \cdot base^{(t)} \cdot tc}{\sum_i \gamma_i \cdot cn_i^{(n)} \cdot base^{(n)} \cdot (1 - tc)} \quad (16)$$

in which  $base^{(n)}$  and  $base^{(t)}$  are the haploid read depth for normal and tumor samples respectively. The relation between the expected read depths  $\overline{d_i^{(n)}}$  and  $\overline{d_i^{(t)}}$  at a SNP  $i$  and base level read depths  $base^{(n)}$  and  $base^{(t)}$  is,



$$\overline{d_i^{(n)}} = base^{(n)} \cdot cn_i^{(n)} \cdot \gamma_i \quad (17)$$

$$\overline{d_i^{(n)}} = base^{(t)} \cdot cn_i^{(n)} \cdot \gamma_i \cdot (1 - tc) + base^{(t)} \cdot cn_i^{(n)} \cdot \frac{cn_i^{(t)}}{2} \cdot \gamma_i \cdot tc \quad (18)$$

Assume  $d_i^n$  and  $d_i^t$  is close enough to  $\overline{d_i^{(n)}}$  and  $\overline{d_i^{(t)}}$ , the  $tc_d$  and  $tc$  can be calculated with equation 16, 17 and 18 as,

$$\frac{tc_d}{1 - tc_d} = \frac{tc}{1 - tc} \cdot \frac{\sum_i cn_i^{(t)}}{2 \cdot n} \quad (19)$$

### Estimation of tumor aneuploidy

Predicting the average ploidy of tumor genome is a tricky problem, because the amount of DNA from a single cell in the primary tumor sample is unquantified for NGS. This causes ambiguity in ploidy estimation. A duplicated genome ({MMPP}) with 2 copies of chromosomes from each parent is indistinguishable from a diploid genome ({MP}), since the genotype of {MMPP} at ploidy of 4 and {MP} at ploidy of 2 are equivalent states and the allelic depths and read depths could not tell which is more likely. If there is a region with odd copy numbers, e.g. the genotype of {MMP} for a genome at average ploidy of 4, the region will strongly against the average ploidy of 2, as there is no equivalent genotype at that ploidy with 1.5 copies.

sCNPhase searched through all possible average ploidy values (the parameter C in Equation 14) from 1.8 to 5.0 and choose the one with the maximal likelihood. sCNPhase was coupled with weak preferences for diploid, unless the allelic depths and read depths at some regions are easier to reconcile at higher copy numbers in higher ploidy. These regions are the “ploidy supporting region”.

For example, **Supplementary Figure 7a** shows the maximum likelihood calculated for the ploidy of 1.9 to 5 for 100% tumor purity sample. Clearly, HCC2218 is more likely to be a tetraploid than a diploid, as chr3p had a region with 3 copy, which supports for higher ploidy (in **Supplementary Figure 7c**). However at 5% tumor purity, the average ploidy was predicted to be close to 2 (in **Supplementary Figure 7ab**), as the less preferred copy number 2 to 3 at 0-50M region in chr3p did not generate as strong signal.

### Adjustment for allelic mappability

Mappability difference between reference and alternative allele produces a tiny bias on allelic depths. In a particular segment, if the maternal alleles are mostly reference alleles or alternative alleles, this bias on allelic mappability is amplified when merging successive maternal alleles. To adjust the allelic depths, we measured the bias by likelihood ratio. This is calculated by the likelihood of observing allelic depth of  $a_i$  and  $b_i$  at a site  $i$  with a reference nucleotide A, and an alternative nucleotide B. This can be formulated as,

$$T(A, B) = \frac{\sum_i a_i}{\sum_i a_i + b_i} \quad (20)$$

$$bias(A, B) = \frac{T(A, B)}{1 - T(A, B)} \quad (21)$$

in which A and B belongs to a set of {A,T,G,C}. A 2D matrix calculated from HCC1143 and HCC1954 is shown as follow in. Therefore allelic depths are recalibrated by increasing the count of an alternative allele by a factor of the bias.

### Removal of merging errors at the boundary of adjacent sCNAs.

The PHFs are created by merging the phased allelic depths for every  $n$  loci, assuming the  $n$  loci are in the same copy number states. However, the merging errors occurs at a region which spans the boundary of two adjacent sCNAs, e.g. one at 5 copies and the other one at 1 copy. The PHFs will instead imply this region at 3 copies. To remove these merging error at the boundary of adjacent sCNAs, we performed an likelihood ratio test, as follows:

$$\Lambda(g_1^{(t)}, g_1^{(t)}, \dots, g_n^{(t)}) = \frac{\max_{g_i^{(t)} \in G} \left( \prod_{i=1}^n P(m_i^{(t)} | d_i^{(t)}, m_i^{(n)}, d_i^{(n)}, g_i^{(t)}, tc) \right)}{\prod_{i=1}^n \max_{g_i^{(t)} \in G} (P(m_i^{(t)} | d_i^{(t)}, m_i^{(n)}, d_i^{(n)}, g_i^{(t)}, tc))} \quad (22)$$

The numerator assumes the  $n$  loci are in a single sCNAs, with a single genotype  $g_i^{(t)}$  from  $G$  which maximizes the likelihood. The denominator assumes the loci are from different sCNAs; therefore they can have an individual genotype, the  $g_i^{(t)}$  is chosen if it maximizes the likelihood. After the  $tc$  is estimated, sCNaphase performs this likelihood test for each PHF, before removes 1% of the PHF that failed this likelihood ratio test.

### Overlapping analysis for copy number segmentations estimated from different tools

To evaluate the performance, the copy number segmentation estimated from sCNaphase was compared with those from CLImAT and COSMIC by overlapping the estimated varied criteria. The overall performance was calculated by comparing how many bases were consistently estimated as gain or loss for any two segmentations. In the same way, the consistency in estimation of LOHs was also counted by per base. For the analysis of the focal sCNAs, a consistent sCNAs is considered if there are at least 50% overlap between two estimated segments. A segment is treated as focal if it is shorter than 4 Mb. We applied this different criteria for focal sCNAs because this per base overlapping criteria is unfair for the relatively shorter focal sCNAs than the longer ones. We choose 4 Mb as the threshold for focal sCNAs because the breakpoints for a focal sCNAs is likely to be inaccurate, given that all the copy number segmentations used in this paper are imputed based on the copy number at the SNPs. Therefore if an

sCNAs is 2Mb in length, the estimation of 2.5Mb is still a reasonable estimation. Since the PHF in 90% of the cases spans over a region at 100K (**Supplementary Figure 8**), we choose this value as the low bound for the focal events.

## **Acknowledgments**

The work was supported by Cancer Council Queensland grant APP1085786 awarded to Dr Lachlan J.M. Coin and UQ-CSC scholarship awarded to Wenhan Chen. We appreciate the WGS data from TCGA consortium, in particular, Dr Adam Ewing for creating the tumor-normal mixtures for HCC1143 and HCC1954. We would also like to thank Illumina BaseSpace for providing the WGS data for HCC1187 and HCC2218, COSMIC server for providing the array-based copy number profiles, and Dr Paul Edwards for the SKY plots. We thank Haojing Shao for analyzing the patterns of the somatic copy number alterations, Dr Sarah Song for collecting the sequencing data and Dr Alison Anderson for reviewing and commenting on the current study.

## References

- Altshuler D, Durbin R, Abecasis G, Bentley D, Chakravarti A, Clark A, Donnelly P, Eichler E, Flicek P, Gabriel S. 2012. An integrated map of genetic variation from 1,092 human genomes. *NATURE* **491**(7422): 56-65.
- Aran D, Sirota M, Butte AJ. 2015. Systematic pan-cancer analysis of tumour purity. *Nat Commun* **6**.
- Bambury RM, Bhatt AS, Riester M, Pedamallu CS, Duke F, Bellmunt J, Stack EC, Werner L, Park R, Iyer G et al. 2015. DNA copy number analysis of metastatic urothelial carcinoma with comparison to primary tumors. *BMC Cancer* **15**(1): 242-242.
- Bast RC, Ravdin P, Hayes DF, Bates S, Fritsche H, Jessup JM, Kemeny N, Locker GY, Mennel RG, Somerfield MR. 2001. 2000 Update of Recommendations for the Use of Tumor Markers in Breast and Colorectal Cancer: Clinical Practice Guidelines of the American Society of Clinical Oncology\*. *Journal of Clinical Oncology* **19**(6): 1865-1878.
- Beroukhi R, Mermel CH, Porter D, Wei G, Raychaudhuri S, Donovan J, Barretina J, Boehm JS, Dobson J, Urashima M et al. 2010. The landscape of somatic copy-number alteration across human cancers. *Nature* **463**(7283): 899-905.
- Boeva V, Popova T, Bleakley K, Chiche P, Cappel J, Schleiermacher G, Janoueix-Lerosey I, Delattre O, Barillot E. 2012. Control-FREEC: a tool for assessing copy number and allelic content using next-generation sequencing data. *Bioinformatics* **28**(3): 423-425.
- Cairns P, Polascik TJ, Eby Y, Tokino K, Califano J, Merlo A, Mao L, Herath J, Jenkins R, Westra W et al. 1995. Frequency of homozygous deletion at p16/CDKN2 in primary human tumours. *Nat Genet* **11**(2): 210-212.
- Carter SL, Cibulskis K, Helman E, McKenna A, Shen H, Zack T, Laird PW, Onofrio RC, Winckler W, Weir BA et al. 2012. Absolute quantification of somatic DNA alterations in human cancer. *Nature biotechnology* **30**(5): 413-421.
- Carter SL, Eklund AC, Kohane IS, Harris LN, Szallasi Z. 2006. A signature of chromosomal instability inferred from gene expression profiles predicts clinical outcome in multiple human cancers. *Nature genetics* **38**(9): 1043-1048.
- Chin K, DeVries S, Fridlyand J, Spellman PT, Roydasgupta R, Kuo W-L, Lapuk A, Neve RM, Qian Z, Ryder T et al. 2006. Genomic and transcriptional aberrations linked to breast cancer pathophysiology. *Cancer cell* **10**(6): 529-541.
- Cho Y-J, Tsherniak A, Tamayo P, Santagata S, Ligon A, Greulich H, Berhoukim R, Amani V, Goumnerova L, Eberhart CG et al. 2011. Integrative genomic analysis of medulloblastoma identifies a molecular subgroup that drives poor clinical outcome. *Journal of the American Society of Clinical Oncology* **29**(11): 1424-1430.
- Coin LJ, Asher JE, Walters RG, Moustafa JSE-S, de Smith AJ, Sladek R, Balding DJ, Froguel P, Blakemore AI. 2010. cnvHap: an integrative population and haplotype-based multiplatform model of SNPs and CNVs. *Nature methods* **7**(7): 541-546.

- Conrad DF, Pinto D, Redon R, Feuk L, Gokcumen O, Zhang Y, Aerts J, Andrews TD, Barnes C, Campbell P et al. 2010. Origins and functional impact of copy number variation in the human genome. *Nature* **464**(7289): 704-712.
- Curtis C, Shah SP, Chin S-F, Turashvili G, Rueda OM, Dunning MJ, Speed D, Lynch AG, Samarajiwa S, Yuan Y et al. 2012. The genomic and transcriptomic architecture of 2,000 breast tumours reveals novel subgroups. *Nature* **486**(7403): 346-352.
- Delaneau O, Howie B, Cox AJ, Zagury J-F, Marchini J. 2013. Haplotype estimation using sequencing reads. *American journal of human genetics* **93**(4): 687-696.
- Desnoyers LR, Pai R, Ferrando RE, Hotzel K, Le T, Ross J, Carano R, D'Souza A, Qing J, Mohtashemi I et al. 2007. Targeting FGF19 inhibits tumor growth in colon cancer xenograft and FGF19 transgenic hepatocellular carcinoma models. *Oncogene* **27**(1): 85-97.
- Forbes SA, Beare D, Gunasekaran P, Leung K, Bindal N, Boutselakis H, Ding M, Bamford S, Cole C, Ward S et al. 2015. COSMIC: exploring the world's knowledge of somatic mutations in human cancer. *Nucleic Acids Research* **43**(D1): D805-D811.
- Goya R, Sun MG, Morin RD, Leung G, Ha G, Wiegand KC, Senz J, Crisan A, Marra MA, Hirst M. 2010. SNVMix: predicting single nucleotide variants from next-generation sequencing of tumors. *Bioinformatics* **26**(6): 730-736.
- Greenman CD, Bignell G, Butler A, Edkins S, Hinton J, Beare D, Swamy S, Santarius T, Chen L, Widaa S. 2010. PICNIC: an algorithm to predict absolute allelic copy number variation with microarray cancer data. *Biostatistics* **11**(1): 164-175.
- Grigorova M, Lyman RC, Caldas C, Edwards PAW. 2005. Chromosome abnormalities in 10 lung cancer cell lines of the NCI-H series analyzed with spectral karyotyping. *Cancer Genetics and Cytogenetics* **162**(1): 1-9.
- Gusnanto A, Wood HM, Pawitan Y, Rabbitts P, Berri S. 2012. Correcting for cancer genome size and tumour cell content enables better estimation of copy number alterations from next-generation sequence data. *Bioinformatics* **28**(1): 40-47.
- Hieronymus H, Schultz N, Gopalan A, Carver BS, Chang MT, Xiao Y, Heguy A, Huberman K, Bernstein M, Assel M et al. 2014. Copy number alteration burden predicts prostate cancer relapse. *Proceedings of the National Academy of Sciences* **111**(30): 11139-11144.
- Kao J, Salari K, Bocanegra M, Choi Y-L, Girard L, Gandhi J, Kwei KA, Hernandez-Boussard T, Wang P, Gazdar AF et al. 2009. Molecular Profiling of Breast Cancer Cell Lines Defines Relevant Tumor Models and Provides a Resource for Cancer Gene Discovery. *PLoS ONE* **4**(7): e6146.
- Keller G, Vogelsang H, Becker I, Plaschke S, Ott K, Suriano G, Mateus AR, Seruca R, Biedermann K, Huntsman D. 2004. Germline mutations of the E-cadherin (CDH1) and TP53 genes, rather than of RUNX3 and HPP1, contribute to genetic predisposition in German gastric cancer patients. *Journal of medical genetics* **41**(6): e89-e89.
- Knudson AG, Hethcote HW, Brown BW. 1975. Mutation and childhood cancer: a probabilistic model for the incidence of retinoblastoma. *Proceedings of the National Academy of Sciences* **72**(12): 5116-5120.

- Krijgsman O, Carvalho B, Meijer Ga, Steenbergen RDM, Ylstra B. 2014. Focal chromosomal copy number aberrations in cancer-Needles in a genome haystack. *Biochimica et biophysica acta* **1843**(11): 2698-2704.
- Lee AJX, Endesfelder D, Rowan AJ, Walther A, Birkbak NJ, Futreal PA, Downward J, Szallasi Z, Tomlinson IPM, Howell M et al. 2011. Chromosomal instability confers intrinsic multidrug resistance. *Cancer research* **71**(5): 1858-1870.
- Li J, Yen C, Liaw D, Podsypanina K, Bose S, Wang SI, Puc J, Miliareis C, Rodgers L, McCombie R et al. 1997. PTEN, a Putative Protein Tyrosine Phosphatase Gene Mutated in Human Brain, Breast, and Prostate Cancer. *Science* **275**(5308): 1943-1947.
- Li Y, Xie X. 2014. Deconvolving tumor purity and ploidy by integrating copy number alterations and loss of heterozygosity. *Bioinformatics* **30**(15): 2121-2129.
- Lips EH, de Graaf EJ, Tollenaar R, van Eijk R, Oosting J, Szuhai K, Karsten T, Nanya Y, Ogawa S, van de Velde CJ et al. 2007. Single nucleotide polymorphism array analysis of chromosomal instability patterns discriminates rectal adenomas from carcinomas. *The Journal of Pathology* **212**(3): 269-277.
- Manoukian S, Peissel B, Pensotti V, Barile M, Cortesi L, Stacchiotti S, Terenziani M, Barbera F, Pasquini G, Frigerio S et al. 2007. Germline mutations of TP53 and BRCA2 genes in breast cancer/sarcoma families. *European Journal of Cancer* **43**(3): 601-606.
- Mayrhofer M, DiLorenzo S, Isaksson A. 2013. Patchwork: allele-specific copy number analysis of whole-genome sequenced tumor tissue. *Genome Biol* **14**(3): R24.
- Mullighan CG, Goorha S, Radtke I, Miller CB, Coustan-Smith E, Dalton JD, Girtman K, Mathew S, Ma J, Pounds SB et al. 2007. Genome-wide analysis of genetic alterations in acute lymphoblastic leukaemia. *Nature* **446**(7137): 758-764.
- Murthy SK, DiFrancesco LM, Ogilvie RT, Demetrick DJ. 2002. Loss of Heterozygosity Associated with Uniparental Disomy in Breast Carcinoma. *Mod Pathol* **15**(12): 1241-1250.
- Neve RM, Chin K, Fridlyand J, Yeh J, Baehner FL, Fevr T, Clark L, Bayani N, Coppe J-P, Tong F et al. 2006. A collection of breast cancer cell lines for the study of functionally distinct cancer subtypes. *Cancer Cell* **10**(6): 515-527.
- Newman AM, Bratman SV, To J, Wynne JF, Eclov NCW, Modlin LA, Liu CL, Neal JW, Wakelee HA, Merritt RE. 2014. An ultrasensitive method for quantitating circulating tumor DNA with broad patient coverage. *Nature medicine*.
- Oesper L, Satas G, Raphael BJ. 2014. Quantifying tumor heterogeneity in whole-genome and whole-exome sequencing data. *Bioinformatics* **30**(24): 3532-3540.
- Pedersen BS, Konstantinopoulos PA, Spillman MA, De S. 2013. Copy neutral loss of heterozygosity is more frequent in older ovarian cancer patients. *Genes, Chromosomes and Cancer* **52**(9): 794-801.
- Pinto D, Darvishi K, Shi X, Rajan D, Rigler D, Fitzgerald T, Lionel AC, Thiruvahindrapuram B, MacDonald JR, Mills R. 2011. Comprehensive assessment of array-based platforms and calling algorithms for detection of copy number variants. *Nature biotechnology* **29**(6): 512-520.
- Sawey Eric T, Chanrion M, Cai C, Wu G, Zhang J, Zender L, Zhao A, Busuttil Ronald W, Yee H, Stein L et al. 2011. Identification of a Therapeutic Strategy



- Targeting Amplified FGF19 in Liver Cancer by Oncogenomic Screening. *Cancer Cell* **19**(3): 347-358.
- Schröck E, Manoir Sd, Veldman T, Schoell B, Wienberg J, Ferguson-Smith MA, Ning Y, Ledbetter DH, Bar-Am I, Soenksen D et al. 1996. Multicolor Spectral Karyotyping of Human Chromosomes. *Science* **273**(5274): 494-497.
- Sheffer M, Bacolod MD, Zuk O, Giardina SF, Pincas H, Barany F, Paty PB, Gerald WL, Notterman Da, Domany E. 2009. Association of survival and disease progression with chromosomal instability: a genomic exploration of colorectal cancer. *Proceedings of the National Academy of Sciences* **106**(17): 7131-7136.
- Side L, Taylor B, Cayouette M, Conner E, Thompson P, Luce M, Shannon K. 1997. Homozygous Inactivation of the NF1 Gene in Bone Marrow Cells from Children with Neurofibromatosis Type 1 and Malignant Myeloid Disorders. *New England Journal of Medicine* **336**(24): 1713-1720.
- Sirivatanauskorn V, Sirivatanauskorn Y, Gorman PA, Davidson JM, Sheer D, Moore PS, Scarpa A, Edwards PAW, Lemoine NR. 2001. Non-random chromosomal rearrangements in pancreatic cancer cell lines identified by spectral karyotyping. *International journal of cancer* **91**(3): 350-358.
- Slamon DJ, Leyland-Jones B, Shak S, Fuchs H, Paton V, Bajamonde A, Fleming T, Eiermann W, Wolter J, Pegram M et al. 2001. Use of Chemotherapy plus a Monoclonal Antibody against HER2 for Metastatic Breast Cancer That Overexpresses HER2. *New England Journal of Medicine* **344**(11): 783-792.
- Stephens PJ, Greenman CD, Fu B, Yang F, Bignell GR, Mudie LJ, Pleasance ED, Lau KW, Beare D, Stebbings La et al. 2011. Massive genomic rearrangement acquired in a single catastrophic event during cancer development. *Cell* **144**(1): 27-40.
- Storlazzi CT, Lonoce A, Guastadisegni MC, Trombetta D, D'Addabbo P, Daniele G, L'Abbate A, Macchia G, Surace C, Kok K et al. 2010. Gene amplification as double minutes or homogeneously staining regions in solid tumors: origin and structure. *Genome research* **20**(9): 1198-1206.
- Tuna M, Knuutila S, Mills GB. 2009. Uniparental disomy in cancer. *Trends in Molecular Medicine* **15**(3): 120-128.
- Whibley C, Pharoah PDP, Hollstein M. 2009. p53 polymorphisms: cancer implications. *Nat Rev Cancer* **9**(2): 95-107.
- Wilks C, Cline MS, Weiler E, Diehkans M, Craft B, Martin C, Murphy D, Pierce H, Black J, Nelson D et al. 2014. The Cancer Genomics Hub (CGHub): overcoming cancer through the power of torrential data. *Database : the journal of biological databases and curation* **2014**.
- Yau C, Mouradov D, Jorissen RN, Colella S, Mirza G, Steers G, Harris A, Ragoussis J, Sieber O, Holmes CC. 2010. A statistical approach for detecting genomic aberrations in heterogeneous tumor samples from single nucleotide polymorphism genotyping data. *Genome biology* **11**(9): R92-R92.
- Yu Z, Liu Y, Shen Y, Wang M, Li A. 2014. CLImAT : accurate detection of copy number alteration and loss of heterozygosity in impure and aneuploid tumor samples using whole-genome sequencing data. *Bioinformatics* **30**(5): 413-421.
- Zack TI, Schumacher SE, Carter SL, Cherniack AD, Saksena G, Tabak B, Lawrence MS, Zhang C-Z, Wala J, Mermel CH et al. 2013. Pan-cancer patterns of somatic copy number alteration. *Nat Genet* **45**(10): 1134-1140.



Zhao X, Li C, Paez JG, Chin K, Jänne PA, Chen T-H, Girard L, Minna J, Christiani D, Leo C. 2004. An integrated view of copy number and allelic alterations in the cancer genome using single nucleotide polymorphism arrays. *Cancer research* **64**(9): 3060-3071.
